# Supplementary material for: Fluorescent perylene derivative functionalized titanium oxide gel for sensitive and portable ascorbic acid detection
Source: Royal Society of Chemistry journal article supplement (doi:10.1039/c9ra01621j), 2019-01-01
Supplement: c9ra01621j1.pdf [file c9ra01621j1.pdf]

## Supporting Information

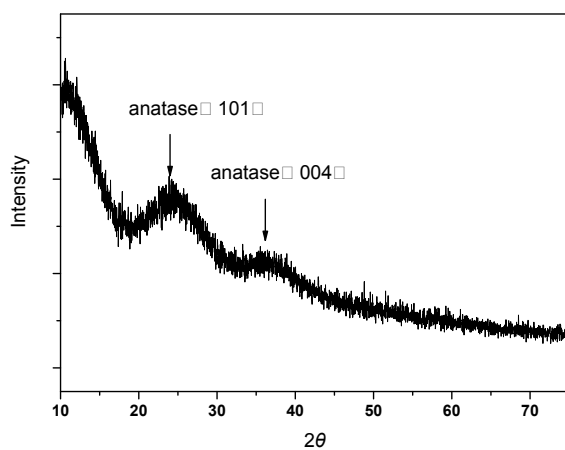

**Fig. S1** The XRD results of the gel, indicating the amorphous nature.

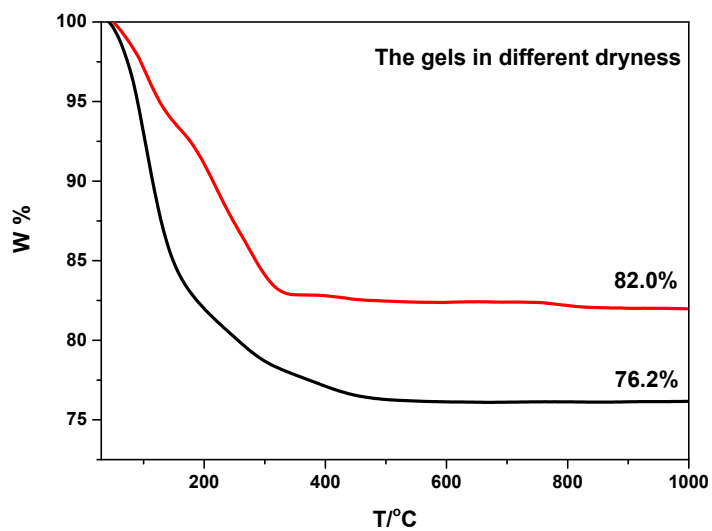

**Fig. S2** The TG results of the gels in different dryness.

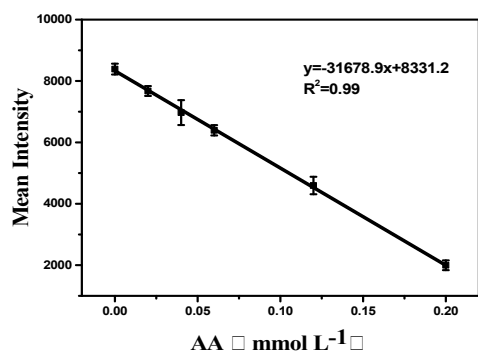

**Fig. S3** The linear relationship between PI-TiO fluorescence intensities at 542 nm and concentration of AA. Error bars are standard deviations of repetitive experiments (n =3)

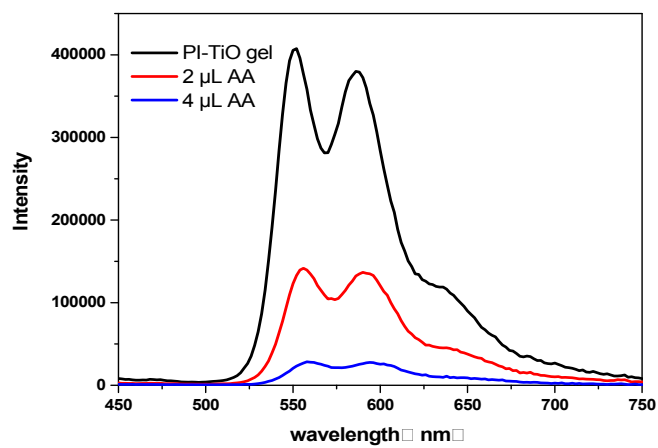

**Fig. S4** The photographs of the fluorescence of the PI-TiO gel added by AA solution (300 μM).

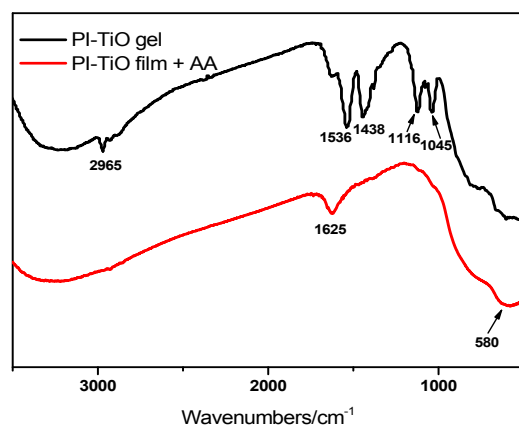

**Fig. S5** The FTIR spectrum of the PI-TiO gel and PI-TiO film after binding with AA.
